# Supplementary material
Source: HighWire-hosted journal article supplement (https://erj.ersjournals.com/content/56/6/2002336)
Supplement: inline-supplementary-material-1 [file inline-supplementary-material-1.pdf]

## **Supplementary Appendix**

### **Contents:**

Table S1. Kuijer and RIETE scores and staging systems for risk of major bleeding complications within 30 days of anticoagulation for PE

Table S2. Observed proportion of major bleeding events for each of the risk score points

Table S3. Test and performance characteristics of the BACS score in the subgroup of 858 patients with complete data on renal function

Table S4. Reclassification of patients who bled or who did not bleed

A) Comparison with Kuijer score

B) Comparison with RIETE score

Table S5. Bleeding definition per some of the commonly used criteria

**Table S1. Kuijer and RIETE scores and staging systems for risk of major bleeding complications within 30 days of anticoagulation for PE****A) Kuijer score**

| Predictor variable | Points |
|--------------------|--------|
| Age >60 year       | 1.6    |
| Female sex         | 1.3    |
| Active malignancy  | 2.2    |

Points are assigned for the presence of each variable. The sum of the variable points produces the total point score (Kuijer risk score; range, 0–5.1). Kuijer risk staging increased with point totals: low-risk (0 points), intermediate-risk (1-3 points), or high-risk (>3 points).

**B) RIETE score**

| Predictor variable      | Points |
|-------------------------|--------|
| Recent bleeding         | 2      |
| Abnormal renal function | 1.5    |
| Anemia                  | 1.5    |
| Age >75 years           | 1      |
| Active malignancy       | 1      |
| PE diagnosis*           | 1      |

**Abbreviations:** PE, pulmonary embolism.

Points are assigned for the presence of each variable. The sum of the variable points produces the total point score (RIETE risk score; range, 0–8). RIETE risk staging increased with point totals: low-risk (0 points), intermediate-risk (1-4 points), or high-risk (>4 points).

\*This variable was not considered for the present analysis.

**Table S2. Observed proportion of major bleeding events for each of the risk score points**

| <b>Point(s)</b> | <b>Patients<br/>N (%)</b> | <b>Major bleeding events*<br/>N (%)</b> |
|-----------------|---------------------------|-----------------------------------------|
| 0               | 446 (38.1)                | 13 (2.9)                                |
| 1               | 517 (44.1)                | 30 (5.8)                                |
| 2               | 174 (14.8)                | 19 (10.9)                               |
| 3               | 26 (2.2)                  | 3 (11.5)                                |
| 4               | 7 (0.6)                   | 2 (28.6)                                |
| 5               | 2 (0.2)                   | 2 (100)                                 |

\*Per risk stratum

**Table S3. Test and performance characteristics of the BACS score in the subgroup of 858 patients with complete data on renal function**

| <b>Risk classification</b>      | <b>Low</b> | <b>Intermediate</b> | <b>High</b> |
|---------------------------------|------------|---------------------|-------------|
| Points                          | 0          | 1-3                 | >3          |
| <b>RIETE derivation cohort</b>  |            |                     |             |
| <b>(N =858)</b>                 |            |                     |             |
| Patients, %                     | 37.2       | 61.9                | 0.9         |
| 30-day major bleeding, %        | 3.4        | 7.3                 | 50.0        |
| 30-day intracranial bleeding, % | 0.6        | 1.7                 | 12.5        |
| 30-day fatal bleeding, %        | 0          | 1.1                 | 25.0        |

**Table S4. Reclassification of patients who bled or who did not bleed****A) Comparison with Kuijer score**

| Patients who did not bleed<br>(N =1,103) |           |              |           |
|------------------------------------------|-----------|--------------|-----------|
|                                          |           | Kuijer score |           |
|                                          |           | Low-risk     | High-risk |
| <i>BACS score</i><br><i>N (%)</i>        | Low-risk  | 120 (56%)    | 313 (35%) |
|                                          | High-risk | 95 (44%)     | 575 (65%) |
| Patients who bled<br>(N =69)             |           |              |           |
|                                          |           | Kuijer score |           |
|                                          |           | Low-risk     | High-risk |
| <i>BACS score</i><br><i>N (%)</i>        | Low-risk  | 4 (33%)      | 9 (16%)   |
|                                          | High-risk | 8 (67%)      | 48 (84%)  |

**B) Comparison with RIETE score**

| Patients who did not bleed<br>(N =1,103) |           |             |           |
|------------------------------------------|-----------|-------------|-----------|
|                                          |           | RIETE score |           |
|                                          |           | Low-risk    | High-risk |
| <i>BACS score</i><br><i>N (%)</i>        | Low-risk  | 236 (60%)   | 197 (28%) |
|                                          | High-risk | 157 (40%)   | 513 (72%) |
| Patients who bled<br>(N =69)             |           |             |           |
|                                          |           | RIETE score |           |
|                                          |           | Low-risk    | High-risk |
| <i>BACS score</i><br><i>N (%)</i>        | Low-risk  | 9 (50%)     | 4 (7.8%)  |
|                                          | High-risk | 9 (50%)     | 47 (92%)  |

**Table S5. Bleeding definition per some of the commonly used criteria**

|              | <b>Major</b>                                                                                                                                                                                       | <b>Minor</b>                                                                                                               | <b>Comment</b>                                                                |
|--------------|----------------------------------------------------------------------------------------------------------------------------------------------------------------------------------------------------|----------------------------------------------------------------------------------------------------------------------------|-------------------------------------------------------------------------------|
| <b>RIETE</b> | Bleeding episodes that require a transfusion of at least 2 units of blood, are retroperitoneal, spinal or intracranial, intraocular, intrapericardial, or are fatal                                | All non-major bleeds                                                                                                       | The RIETE bleeding definition has been in use since 2001                      |
| <b>TIMI</b>  | Intracranial, clinical signs of hemorrhage with a hemoglobin decrease greater than 5 g/dL                                                                                                          | Observed blood loss and decrease in hemoglobin level of 3 to 5 g/dL                                                        | Initially developed for cardiovascular diseases other than pulmonary embolism |
| <b>GUSTO</b> | Intracranial hemorrhage or bleeding that causes hemodynamic compromise and requires intervention                                                                                                   | Bleeding that requires blood transfusion but does not result in hemodynamic compromise                                     | Initially developed for cardiovascular diseases other than pulmonary embolism |
| <b>ISTH</b>  | Fatal bleeding and/or symptomatic bleeding in critical area or organ, and/or bleeding causing fall in hemoglobin to 2 g/dL leading to transfusion of two or more units of whole blood or red cells | Clinically relevant: hospital admission for bleeding, physician guidance for bleeding, or change in antithrombotic therapy | Similar to the RIETE bleeding definition                                      |
